# Supplementary material for: Severe gut microbiota dysbiosis caused by malnourishment can be partly restored during 3 weeks of refeeding with fortified corn-soy-blend in a piglet model of childhood malnutrition
Source: PubMed Central journal article supplement (PMC6902335; doi:10.1186/s12866-019-1658-5), 2019-12-10

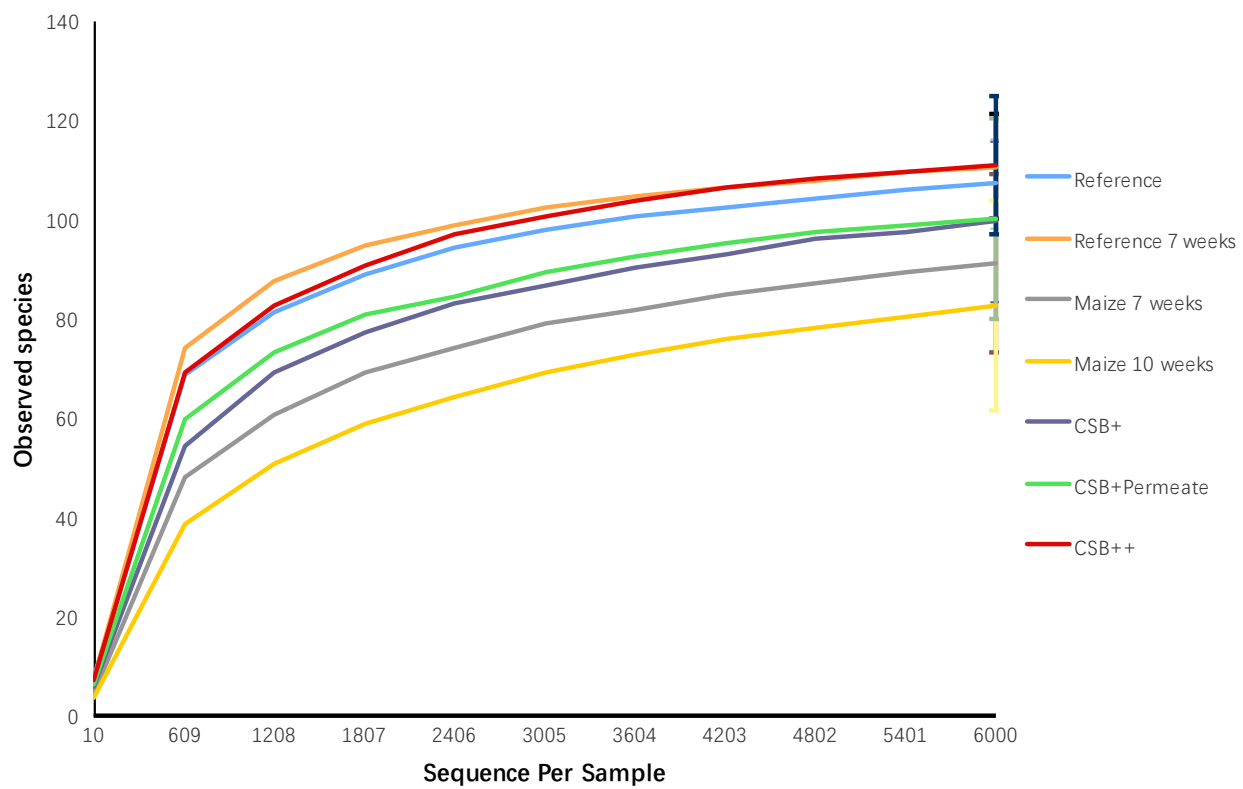

Supplement: 12866_2019_1658_MOESM1_ESM.pdf [file 12866_2019_1658_MOESM1_ESM.pdf]
